# Supplementary material
Source: PubMed Central journal article supplement (PMC4648709)
Supplement: NIHMS722498-supplement.pdf [file NIHMS722498-supplement.pdf]

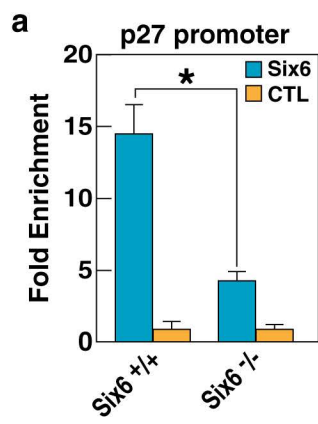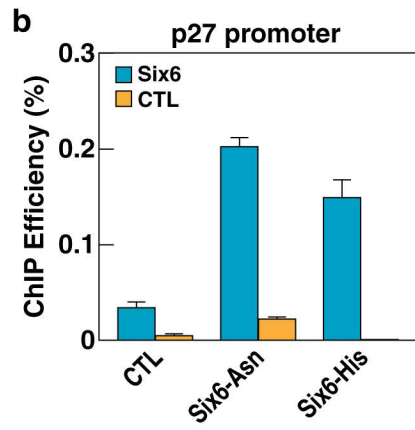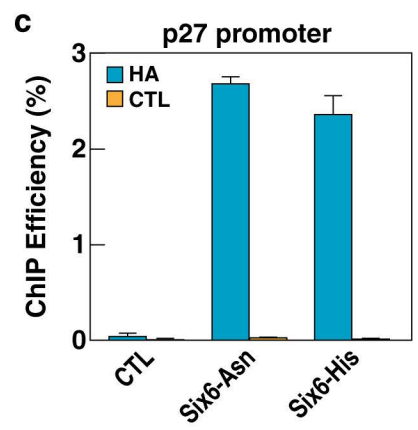

**a**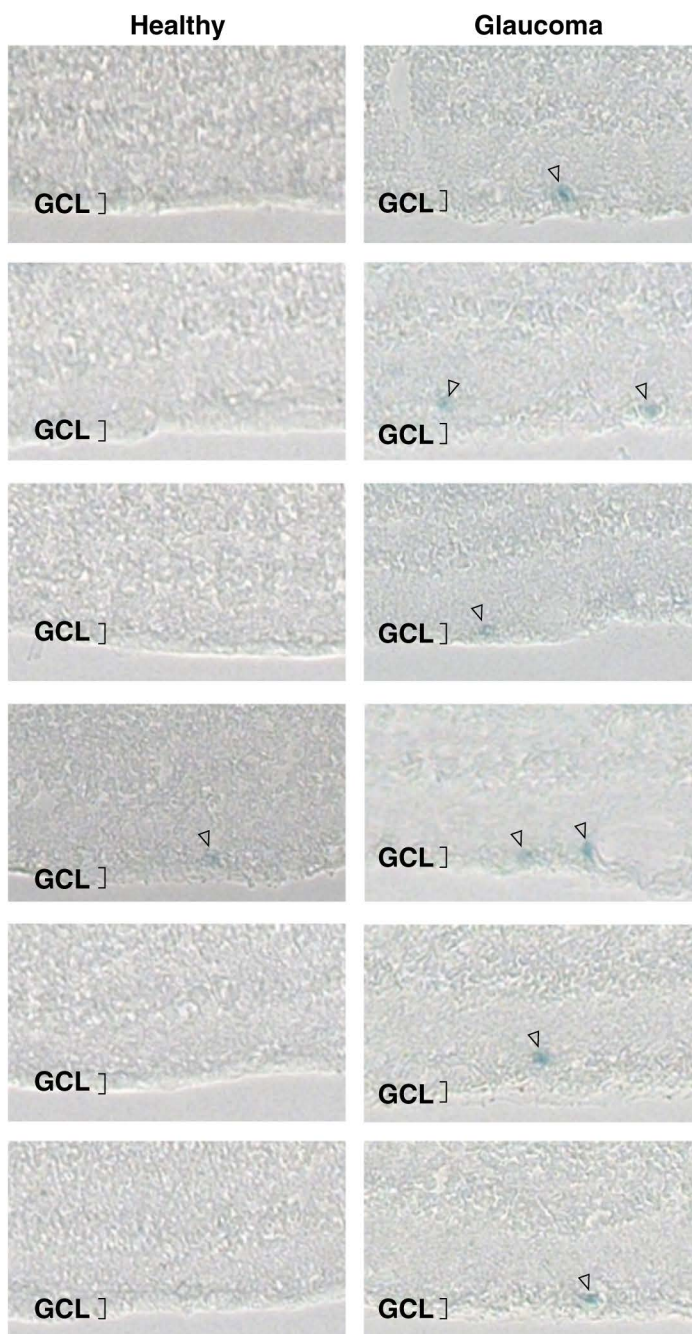**b**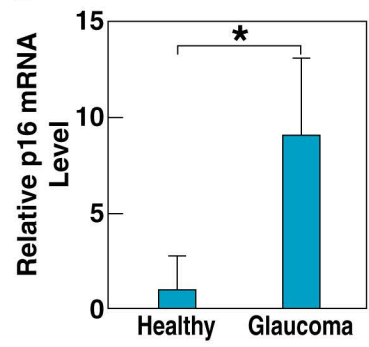

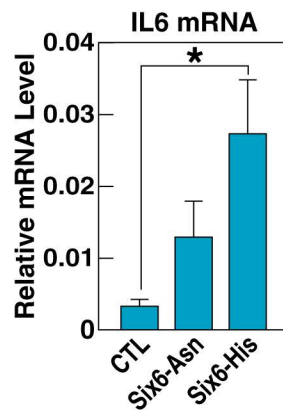

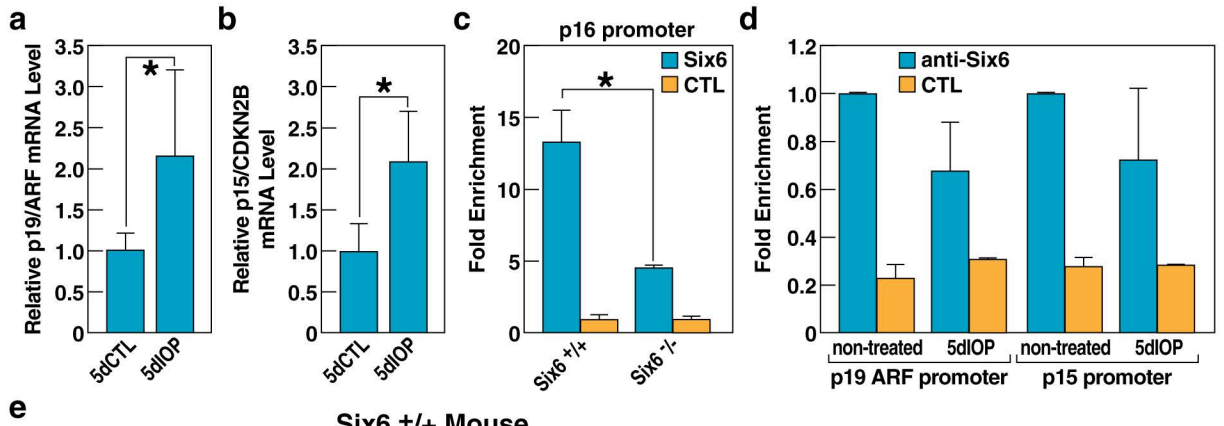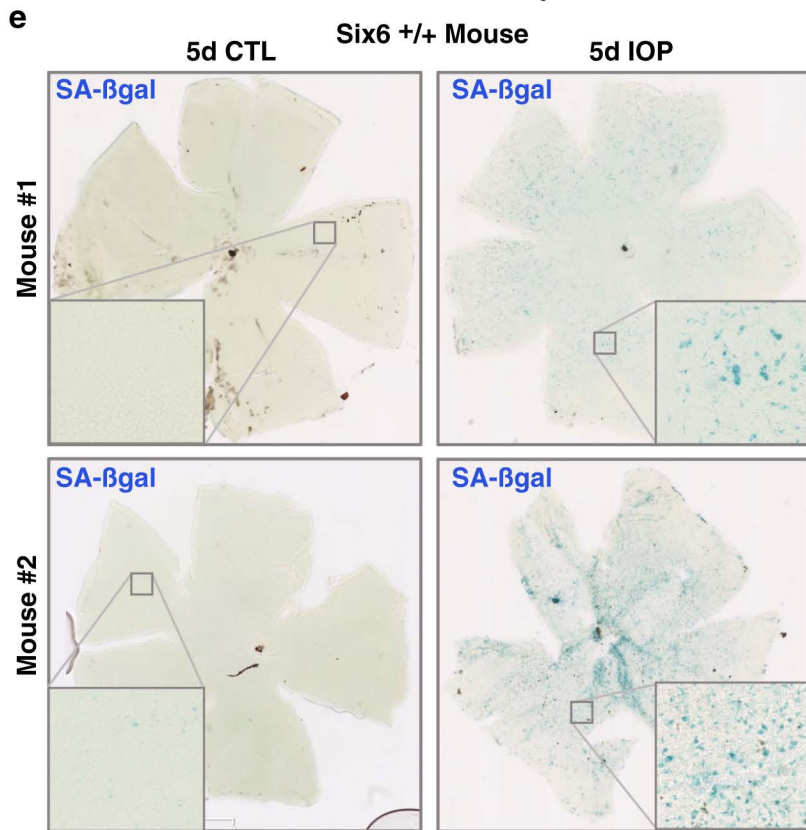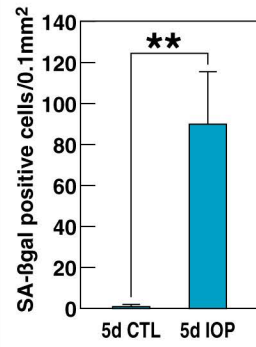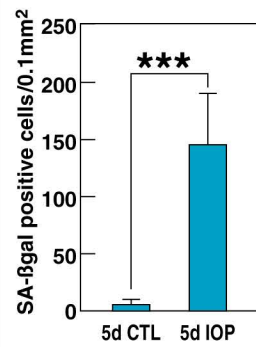

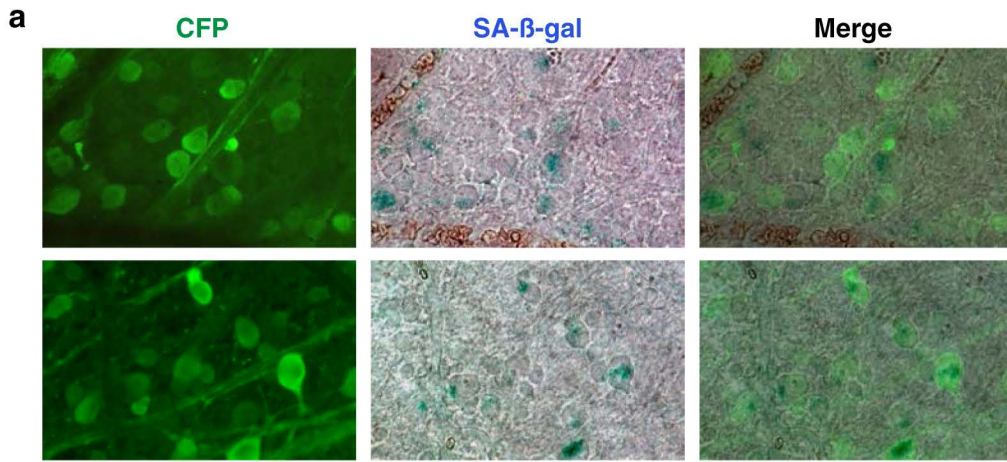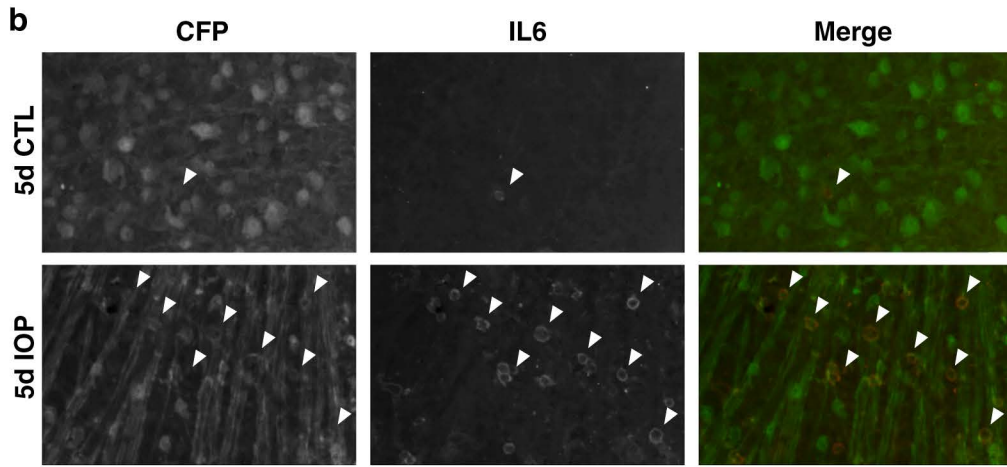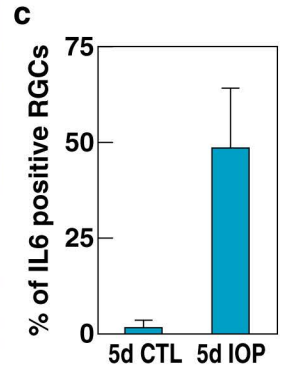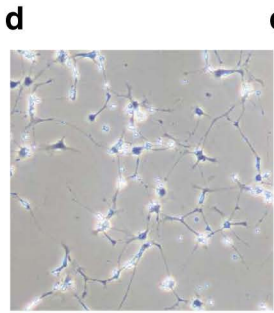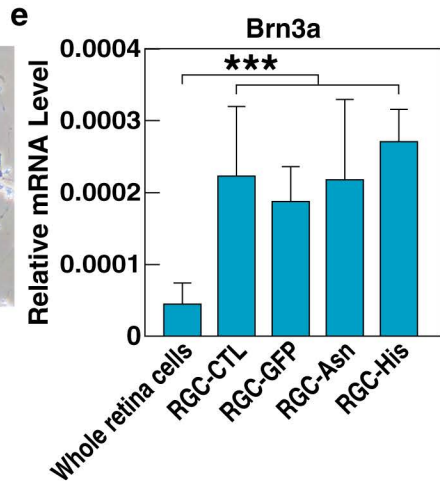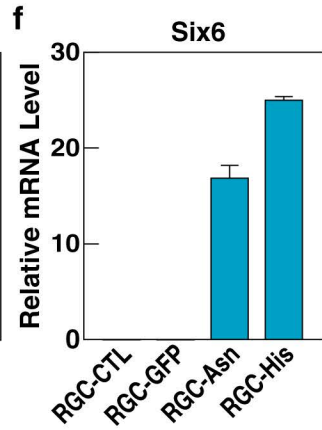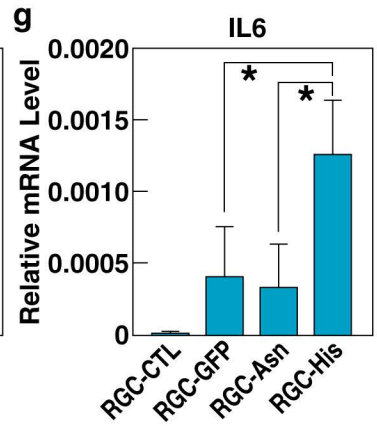

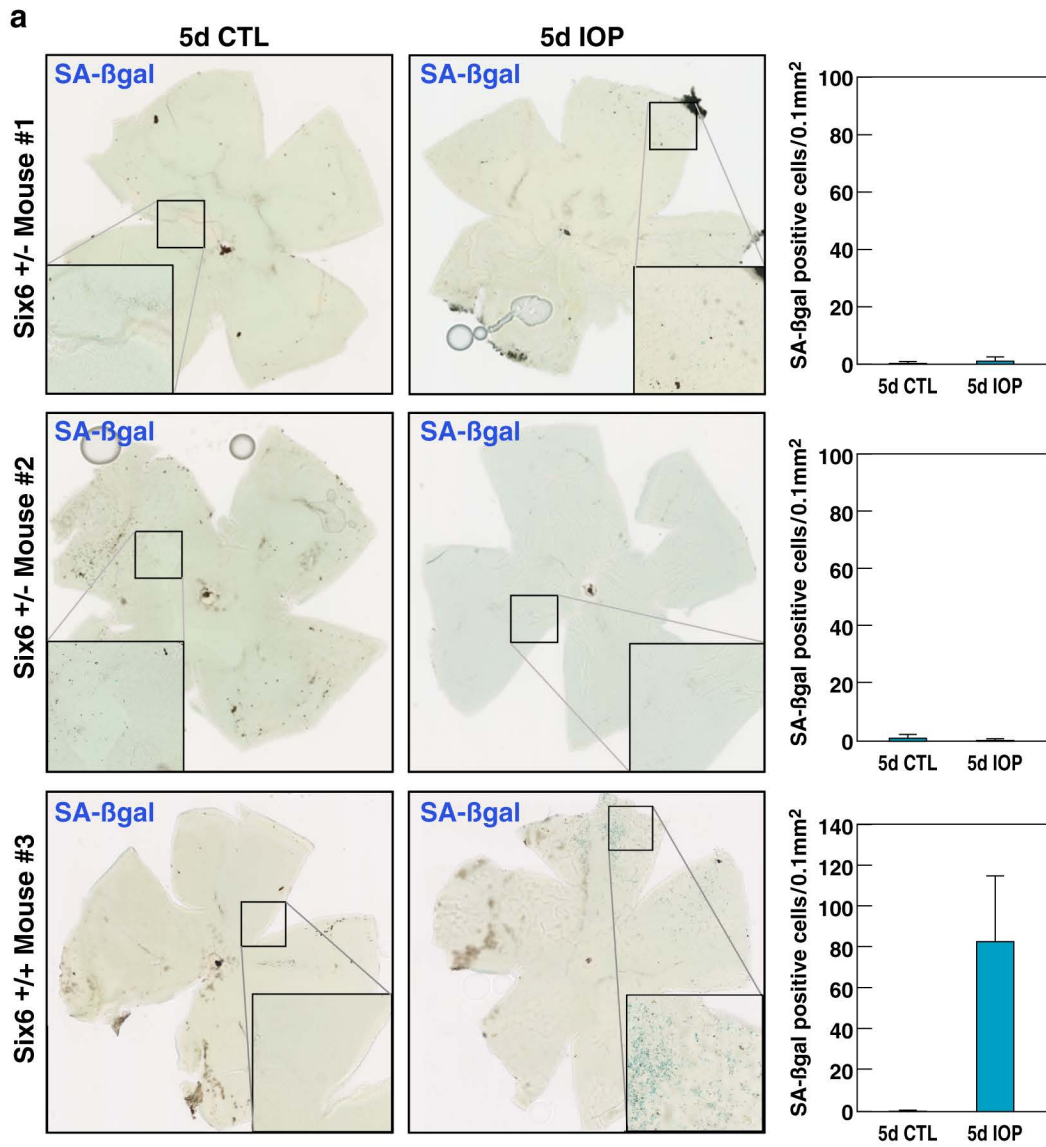

**b** Association of P53-rs1042522 (Pro72Arg) Risk Allele and POAG

| SNP       | Risk Allele | Case (n=833) | Control (n=763) | P Value (allelic) | OR (95% CI)      |
|-----------|-------------|--------------|-----------------|-------------------|------------------|
| rs1042522 | C           | 0.304        | 0.271           | 0.040             | 1.17 (1.00-1.37) |



**Figure S1 (related to Figure 1). Six6 protein residue 141 variants bind to DNA with similar efficiency.** **a**, Validation of SIX6 antibody specificity by qPCR analysis of ChIP signals on known target. p27 regulatory region shows highly reduced signal in *Six6*<sup>-/-</sup> retinas. Experiments repeated 3 times, p-values calculated using a two-tailed Student's t-test (+/- SD; \*p<0.05). CTL, negative control. **b, c**, ChIP-qPCR experiments using either SIX6 antibody (**b**) or HA antibody (**c**) after overexpression of HA-tagged SIX6 protein variants show that both forms bind efficiently to the p27 regulatory region. Experiments repeated 3 times, p-values calculated using a two-tailed Student's t-test. +/- SD. CTL, negative control.

**Figure S2 (related to Figure 2). Increased senescence in human glaucoma retinas.** **a**, Several examples of SA-βgal analysis of the human retina showing higher numbers of senescent cells in retinas with POAG. **b**, RT-qPCR analysis of expression of p16/INK4A mRNA in four healthy and four POAG human retinas showing significant upregulation of the p16/INK4A transcript in the diseased retinas. p-values were calculated using a two-tailed Student's t-test (+/- SD; \*p<0.05).

**Figure S3 (related to Figure 3).** Induction of IL6, a senescence associated secretory phenotype marker, in immunopanned RGCs upon Six6 protein overexpression. Experiments were repeated 3 times, p-values were calculated using a two-tailed student's t-test. (+/- SD; \*p<0.05). CTL, negative control.

**Figure S4 (related to Figure 4). Higher expression of Six6 protein and induction of senescence in retinas upon IOP elevation.** **a,b**, RT-qPCR analysis of p19ARF (**a**) and p15/CDKN2B (**b**) gene expression in retinas 5 days after IOP-elevation (5d IOP) as compared to non-treated retinas (5d CTL). p-values were calculated using a two-tailed student's t-test (+/- SD; \*p<0.05). **c**, ChIP-qPCR analysis of WT and *Six6*<sup>-/-</sup> retinas showed enrichment of SIX6 protein on p16 regulatory elements. Experiments were repeated 3 times, p-values were calculated using a two-tailed student's t-test (+/- SD; \*p<0.05). CTL, negative control. **d**, ChIP-qPCR analysis of the recruitment of Six6 protein to the p19ARF and p15/CDKN2B promoters after IOP-elevation (5d IOP) as compared to no-treated retinas (5d CTL). Experiment performed 3 times (+/- SD). CTL, negative control. **e**, SA-βgal staining of flat-mounted retinas isolated from treated (5d IOP) and non-treated (5d CTL)

eyes shows a high number of senescent cells in treated tissue. *Right panels*: quantification of number of SA- $\beta$ gal positive cells in presented retinas. p-values were calculated using a two-tailed Student's t-test (+/- SD; \*\*p<0.01, \*\*\*p<0.001).

**Figure S5 (related to Figure 5). IOP-elevation affects retinal ganglion cells.** **a**, Several examples of double, SA- $\beta$ gal and CFP positive cells in IOP-treated Thy1-CFP retinas. **b**, Immunostaining of IOP-treated (5d IOP) and untreated (5d CTL) Thy1-CFP retinas using anti-GFP and anti-IL6 antibodies. The number of double-positive cells is specifically increased in IOP-treated tissue. **c**, Quantification of IL6/CFP double-positive cells in IOP-treated retinas in 3 randomly selected fields (+/- SD). **d**, RGC purified by immunopanning after 2 days in culture. **e**, Expression of Brn3a in whole retina cells and immunopanned cells was measured by RT-qPCR. p-values were calculated using a two-tailed Student's t-test, (+/- SD; \*\*\*p<0.001). **f**, Overexpression levels of the His and Asn variants of Six6 in transfected cells was measured using RT-qPCR. +/- SD. **g**, RT-qPCR analysis of IL6 expression in RGCs upon Six6 variants or GFP (RGC-GFP) overexpression as compared to non-transfected cells (RGC-CTL). p-values were calculated using a two-tailed Student's t-test (+/- SD; \*p<0.05).

**Figure S6 (related to Figure 6). Lack of Six6 protects RGCs against senescence.** **a**, SA- $\beta$ gal staining of flat-mounted mouse retinas isolated from IOP treated (5d IOP) and non-treated (5d CTL) *Six6*<sup>+/-</sup> eyes shows no increase in the number of senescent cells upon IOP elevation, as compared to the *Six6*<sup>+/+</sup> eyes (*bottom panels*) *Right panels*: quantification of SA- $\beta$ gal positive cells in presented retinas, +/- SD; **b**, Association of p53-rs1042522 (Pro72Arg) amino acid variant with POAG.



**Table S1 (related to Figure 1). Meta-analysis results for SNP rs33912345 in POAG**

| Gene/SNP        | Risk Allele | Cohorts                      | Sample size (n) |         | Risk allele frequency |         | P value(Allelic) | OR (95% CI)      | <i>P<sub>het</sub></i> |
|-----------------|-------------|------------------------------|-----------------|---------|-----------------------|---------|------------------|------------------|------------------------|
|                 |             |                              | Case            | Control | Case                  | Control |                  |                  |                        |
| SIX6/rs33912345 | C           | Caucasian cohort             | 1,130           | 4,036   | 0.46                  | 0.38    | 4.49E-12         | 1.39 (1.27-1.53) | 0.818                  |
|                 |             | Mexican cohort               | 105             | 188     | 0.41                  | 0.31    | 1.10E-02         | 1.57 (1.09-2.27) |                        |
|                 |             | Cohort (Carnes et al., 2014) | 482             | 433     | 0.47                  | 0.38    | 1.05E-04         | 1.41 (1.16-1.70) |                        |
|                 |             | All combined                 | 1,717           | 4,657   | 0.46                  | 0.38    | 4.84E-16         | 1.40 (1.29-1.52) |                        |

Meta-analysis was performed using inverse-variance method. CI, confidence interval; OR, odds ratio; *P<sub>het</sub>*, *P*-value of heterogeneity.

Carnes, M.U., Liu, Y.P., Allingham, R.R., Whigham, B.T., Havens, S., Garrett, M.E., Qiao, C., Katsanis, N., Wiggs, J.L., Pasquale, L.R., *et al.* (2014). Discovery and functional annotation of SIX6 variants in primary open-angle glaucoma. *PLoS genetics* 10, e1004372.

**Table S2. Primer sequence information**

| <b>Primer name</b>       | <b>Sequence (5'-3')</b>                    |
|--------------------------|--------------------------------------------|
| <b>Genotyping</b>        |                                            |
| <b>rs33912345</b>        |                                            |
| rs33912345-Forward       | GTGGCCTTTCACGGTGGCAACT                     |
| rs33912345-Reverse       | GTTGCCACCTGCGTAGGGGT                       |
| rs33912345-Extension     | GGTTAGGGTATGGATCCTGCAGGTACCACTCGCGTAGCAGGT |
| <b>rs1042522</b>         |                                            |
| rs1042522-Forward        | GATGCTGTCCCCGGACGATAT                      |
| rs1042522-Reverse        | GCCCAGACGGAAACCGTAGCT                      |
| rs1042522-Extension      | CGGTGTAGGAGCTGCTGGTGCAGGGGCCACG            |
| <b>rs3731239</b>         |                                            |
| rs3731239-Forward        | GTAAGATGTGCTGGGACTACT                      |
| rs3731239-Reverse        | CGAACTCCCGACCTCAGGTGAT                     |
| rs3731239-Extension      | CTGTGGTGTATGTTGGAATAAATATCGAATA            |
| <b>qPCR</b>              |                                            |
| Human GAPDH-Forward      | GAGTCAACGGATTTGGTCGT                       |
| Human GAPDH-Reverse      | GACAAGCTTCCCGTTCTCAG                       |
| Human P16 -Forward       | GAGCAGCATGGAGCCTTC                         |
| Human P16 -Reverse       | CCTCCGACCGTAACTATTCG                       |
| Human SIX6-Forward       | AGAATGAGTCGGTGCTACGC                       |
| Human SIX6-Reverse       | GCCTCCTGGTAGTTGTGCTTC                      |
| Human IL6 - Forward      | ACTCACCTCTTCAGAACGAATTG                    |
| Human IL6 - Reverse      | CCATCTTTGGAAGGTTCAGGTTG                    |
| Mouse GAPDH-Forward      | GTCAAGGCCGAGAATGGGAA                       |
| Mouse GAPDH-Reverse      | TTGGCTCCACCCTTCAAGTG                       |
| Mouse p16/INK4a-Forward  | GCGGACTCCATGCTGCTC                         |
| Mouse p16/INK4a-Reverse  | CACGACTGGGCGATTGGG                         |
| Mouse SIX6-Forward       | ACTCCAGCAGCAGGTTCTGT                       |
| Mouse SIX6-Reverse       | AGATGTCGCACTCACTGTCG                       |
| Mouse p19/ARF-Forward    | CGCAGGTTCTTGGTCACTGT                       |
| Mouse p19/ARF-Reverse    | TGTTACGAAAGCCAGAGCG                        |
| Mouse p15/cdkn2b-Forward | TTGCGGAAGGCGGAGGGAAC                       |
| Mouse p15/cdkn2b-Reverse | AAGAGCAGGGCCACCGTGAC                       |
| Rat GAPDH-Forward        | Qiagen cat no. QT0099633                   |
| Rat GAPDH-Reverse        |                                            |
| Rat P16-Forward          | CGATCCGGAGCAGCATGGAGTC                     |
| Rat P16-Reverse          | TTCCAGCAGTGCCCCGCACCTCG                    |
| Rat IL6 - Forward        | GCCTTCTTGGGACTGATG                         |
| Rat IL6 - Reverse        | TGTGGGTGGTATCCTCTG                         |
| Rat Brn3a - Forward      | CAGGAGTCCCATGTAAGA                         |

Rat Brn3a - Reverse ACAGGGAAACACTTCTGC

## ChIP

Human P16 promoter-Forward ACCCTGTCCCTCAAATCC  
Human P16 promoter-Reverse GGTGCCACATTGCTAAG  
Human P27 promoter-Forward CAATATGGCGGTGGAAGG  
Human P27 promoter-Reverse CCGCAACCAATGGATCTC

Mouse P16 promoter-Forward ATGGAGCCCGGACTACAG  
Mouse P16 promoter-Reverse GGTGTTAGCGTGGGTAGC  
Mouse p19/ARF promoter-Forward CACTGTGACAAGCGAGGTGAG  
Mouse p19/ARF promoter-Reverse GATGGGCGTGGAGCAAAGATG  
Mouse p15 promoter-Forward AAGTTGTGCCTCTGCACTC  
Mouse p15 promoter-Reverse GCGATTGATGCCTCCAAG
